# Supplementary material for: Safety and survival data in patients with idiopathic pulmonary fibrosis treated with nintedanib: pooled data from six clinical trials
Source: PubMed Central journal article supplement — BMJ Open Respir Res. 2019 Mar 25;6(1):e000397. doi: 10.1136/bmjresp-2018-000397 (PMC6530503; doi:10.1136/bmjresp-2018-000397), 2019-03-25
Supplement: bmjresp-2018-000397supp001.pdf [file bmjresp-2018-000397supp001.pdf]

## ONLINE SUPPLEMENTARY MATERIAL

**Table S1.** Exposure in the pooled nintedanib population and in nintedanib- and placebo-treated patients in the INPULSIS® trials

|                               | Pooled population<br>treated with<br>nintedanib<br>(n=1126) | INPULSIS®             |                    |
|-------------------------------|-------------------------------------------------------------|-----------------------|--------------------|
|                               |                                                             | Nintedanib<br>(n=638) | Placebo<br>(n=423) |
| Exposure, months              |                                                             |                       |                    |
| Mean (SD)                     | 27.7 (20.5)                                                 | 10.3 (3.4)            | 10.8 (2.8)         |
| Median                        | 22.5                                                        | 11.9                  | 11.9               |
| Maximum                       | 93.1                                                        | 12.7                  | 13.1               |
| Total exposure, patient-years | 2599                                                        | 548                   | 383                |

**Table S2.** Exposure to nintedanib in individual trials

|                               | TOMORROW<br>(NCT00514683)<br>(n=85) | TOMORROW<br>open-label<br>extension<br>(NCT01170065)<br>(n=35) | IMPULSIS-1<br>(NCT01335464)<br>(n=309) | IMPULSIS-2<br>(NCT01335477)<br>(n=329) | IMPULSIS-ON<br>open-label<br>extension<br>(NCT01619085)<br>(n=734) | Phase IIIb trial<br>(NCT01979952)<br>(n=99) |
|-------------------------------|-------------------------------------|----------------------------------------------------------------|----------------------------------------|----------------------------------------|--------------------------------------------------------------------|---------------------------------------------|
| Exposure, months              |                                     |                                                                |                                        |                                        |                                                                    |                                             |
| Mean (SD)                     | 14.3 (7.8)                          | 33.9 (24.3)                                                    | 10.3 (3.3)                             | 10.3 (3.4)                             | 28.8 (16.3)                                                        | 10.3 (5.7)                                  |
| Median                        | 16.1                                | 23.7                                                           | 11.9                                   | 11.9                                   | 31.5                                                               | 9.6                                         |
| Maximum                       | 25.9                                | 69.1                                                           | 12.5                                   | 12.7                                   | 56.2                                                               | 19.1                                        |
| Total exposure, patient–years | 101                                 | 99                                                             | 265                                    | 283                                    | 1765                                                               | 85                                          |

**Table S3.** Adverse events leading to permanent dose reduction in the pooled nintedanib population and in nintedanib- and placebo-treated patients in the INPULSIS® trials

|                  | Pooled population treated with nintedanib (n=1126) |                                             | INPULSIS®          |                                             |                 |                                             |
|------------------|----------------------------------------------------|---------------------------------------------|--------------------|---------------------------------------------|-----------------|---------------------------------------------|
|                  |                                                    |                                             | Nintedanib (n=638) |                                             | Placebo (n=423) |                                             |
|                  | Events, n                                          | Event rate (per 100 patient exposure–years) | Events, n          | Event rate (per 100 patient exposure–years) | Events, n       | Event rate (per 100 patient exposure–years) |
| Diarrhoea        | 202                                                | 7.4                                         | 68                 | 11.4                                        | 0               | 0.0                                         |
| Nausea           | 27                                                 | 1.0                                         | 11                 | 1.8                                         | 0               | 0.0                                         |
| Vomiting         | 19                                                 | 0.7                                         | 7                  | 1.2                                         | 0               | 0.0                                         |
| Weight decreased | 16                                                 | 0.6                                         | 4                  | 0.7                                         | 1               | 0.2                                         |

Adverse events leading to permanent dose reduction with event rate >0.5 per 100 patient exposure–years in the pooled population are shown.

**Table S4.** Adverse events leading to permanent treatment discontinuation in the pooled nintedanib population and in nintedanib- and placebo-treated patients in the INPULSIS® trials

|                     | Pooled population treated with nintedanib (n=1126) |                                             | INPULSIS®          |                                             |                 |                                             |
|---------------------|----------------------------------------------------|---------------------------------------------|--------------------|---------------------------------------------|-----------------|---------------------------------------------|
|                     |                                                    |                                             | Nintedanib (n=638) |                                             | Placebo (n=423) |                                             |
|                     | Events, n                                          | Event rate (per 100 patient exposure–years) | Events, n          | Event rate (per 100 patient exposure–years) | Events, n       | Event rate (per 100 patient exposure–years) |
| Progression of IPF* | 115                                                | 4.2                                         | 13                 | 2.2                                         | 21              | 5.1                                         |
| Diarrhoea           | 99                                                 | 3.6                                         | 28                 | 4.7                                         | 1               | 0.2                                         |
| Nausea              | 26                                                 | 1.0                                         | 13                 | 2.2                                         | 0               | 0.0                                         |
| Weight decreased    | 21                                                 | 0.8                                         | 6                  | 1.0                                         | 1               | 0.2                                         |
| Decreased appetite  | 19                                                 | 0.7                                         | 9                  | 1.5                                         | 1               | 0.2                                         |
| Vomiting            | 13                                                 | 0.5                                         | 5                  | 0.8                                         | 0               | 0.0                                         |
| Pneumonia           | 11                                                 | 0.4                                         | 6                  | 1.0                                         | 1               | 0.2                                         |
| Pulmonary embolism  | 10                                                 | 0.4                                         | 2                  | 0.3                                         | 2               | 0.5                                         |
| Abdominal pain      | 9                                                  | 0.3                                         | 5                  | 0.8                                         | 1               | 0.2                                         |
| Dyspnoea            | 8                                                  | 0.3                                         | 0                  | 0.0                                         | 1               | 0.2                                         |
| Respiratory failure | 8                                                  | 0.3                                         | 0                  | 0.0                                         | 1               | 0.2                                         |
| Asthenia            | 7                                                  | 0.3                                         | 4                  | 0.7                                         | 0               | 0.0                                         |

Adverse events with event rate >0.25 per 100 patient exposure–years in the pooled population are shown. \*Corresponds to MedDRA term ‘IPF’, which included disease worsening and acute exacerbations.

**Table S5.** Serious adverse events in the pooled nintedanib population and in nintedanib- and placebo-treated patients in the INPULSIS® trials

|                        | Pooled population treated with nintedanib (n=1126) |                                             | INPULSIS®          |                                             |                 |                                             |
|------------------------|----------------------------------------------------|---------------------------------------------|--------------------|---------------------------------------------|-----------------|---------------------------------------------|
|                        |                                                    |                                             | Nintedanib (n=638) |                                             | Placebo (n=423) |                                             |
|                        | Events, n                                          | Event rate (per 100 patient exposure–years) | Events, n          | Event rate (per 100 patient exposure–years) | Events, n       | Event rate (per 100 patient exposure–years) |
| Progression of IPF*    | 229                                                | 8.4                                         | 46                 | 7.7                                         | 47              | 11.4                                        |
| Pneumonia              | 113                                                | 4.2                                         | 28                 | 4.7                                         | 22              | 5.3                                         |
| Pulmonary hypertension | 67                                                 | 2.5                                         | 11                 | 1.8                                         | 10              | 2.4                                         |
| Lung infection         | 56                                                 | 2.1                                         | 3                  | 0.5                                         | 0               | 0                                           |
| Dyspnoea               | 49                                                 | 1.8                                         | 3                  | 0.5                                         | 6               | 1.5                                         |
| Respiratory failure    | 46                                                 | 1.7                                         | 2                  | 0.3                                         | 9               | 2.2                                         |

Serious adverse events with event rate >1.5 per 100 patient exposure–years in the pooled population are shown. \*Corresponds to MedDRA term ‘IPF’, which included disease worsening and acute exacerbations.

**Table S6.** Deaths in nintedanib-treated patients in the individual trials and in the pooled nintedanib population

|                                                                         | Number of deaths |
|-------------------------------------------------------------------------|------------------|
| TOMORROW trial (NCT00514683) and its open-label extension (NCT01170065) | 22               |
| INPULSIS-1* (NCT01335464)                                               | 18               |
| INPULSIS-2 (NCT01335477)                                                | 30               |
| INPULSIS-ON (NCT01619085)                                               | 179              |
| Phase IIIb trial (NCT01979952)                                          | 4                |
| Total                                                                   | 253              |

The pooled nintedanib population comprised 1126 patients. \*One additional death, which occurred after lung transplant, was not taken into account in the survival models.

**Table S7.** Deaths in placebo-treated patients in the individual trials and in the pooled placebo population

|                                | Number of deaths |
|--------------------------------|------------------|
| TOMORROW trial (NCT00514683)   | 14               |
| IMPULSIS-1 (NCT01335464)       | 14               |
| IMPULSIS-2 (NCT01335477)       | 24               |
| Phase IIIb trial (NCT01979952) | 5                |
| Total                          | 57               |

The pooled placebo population comprised 565 patients.
